# Supplementary material
Source: ML conference proceedings conference paper supplement (https://aclanthology.org/D19-5402)
Supplement: Attachment [file supplement.pdf › supplement.pdf]

|                                                                                                                                                                                                                                                                                                                                                                                                                                                                                                                                                                                                                                                                                                                                                                                                                                                                                                                                                                                                                                                                                                                                                                                                                                                                                                                                                                                                                                                                                                                                                                                                                                                                                                                                             |
|---------------------------------------------------------------------------------------------------------------------------------------------------------------------------------------------------------------------------------------------------------------------------------------------------------------------------------------------------------------------------------------------------------------------------------------------------------------------------------------------------------------------------------------------------------------------------------------------------------------------------------------------------------------------------------------------------------------------------------------------------------------------------------------------------------------------------------------------------------------------------------------------------------------------------------------------------------------------------------------------------------------------------------------------------------------------------------------------------------------------------------------------------------------------------------------------------------------------------------------------------------------------------------------------------------------------------------------------------------------------------------------------------------------------------------------------------------------------------------------------------------------------------------------------------------------------------------------------------------------------------------------------------------------------------------------------------------------------------------------------|
| <b>Source document</b>                                                                                                                                                                                                                                                                                                                                                                                                                                                                                                                                                                                                                                                                                                                                                                                                                                                                                                                                                                                                                                                                                                                                                                                                                                                                                                                                                                                                                                                                                                                                                                                                                                                                                                                      |
| <p>(CNN) Duke University students and faculty members marched Wednesday afternoon chanting “We are not afraid. We stand together,” after a noose was found hanging from a tree on campus. Duke officials have asked anyone with information about the rope noose, which was found near a student center at 2 a.m., to call campus police. Photos of the noose prompted outrage from the community as they were passed along on social media. At a forum held on the steps of Duke Chapel, close to where the noose was hung, hundreds of people gathered. “You came here for the reason that you want to say with me, ‘This is no Duke we will accept. This is no Duke we want. This is not the Duke we’re here to experience. And this is not the Duke we’re here to create,’ ” Duke President Richard Brodhead told the crowd. The incident is one of several recent racist events to affect college students. Last month a fraternity at the University of Oklahoma had its charter removed after a video surfaced showing members using the N-word and referring to lynching in a chant. Two students were expelled. In February, a noose was hung around the neck of a statue of a famous civil rights figure at the University of Mississippi. A statement issued by Duke said there was a previous report of hate speech directed at students on campus. In the news release, the vice president for student affairs called the noose incident a “cowardly act.” “To whomever committed this hateful and stupid act, I just want to say that if your intent was to create fear, it will have the opposite effect,” Larry Moneta said. Duke University is a private college with about 15,000 students in Durham, North Carolina.</p> |
| <b>Ground truth summary</b>                                                                                                                                                                                                                                                                                                                                                                                                                                                                                                                                                                                                                                                                                                                                                                                                                                                                                                                                                                                                                                                                                                                                                                                                                                                                                                                                                                                                                                                                                                                                                                                                                                                                                                                 |
| <p>The noose, made of rope, was discovered on campus about 2 a.m.<br/> Hundreds of people gathered Wednesday afternoon to show solidarity against racism<br/> Duke official says to unknown perpetrator: You wanted to create fear but the opposite will happen</p>                                                                                                                                                                                                                                                                                                                                                                                                                                                                                                                                                                                                                                                                                                                                                                                                                                                                                                                                                                                                                                                                                                                                                                                                                                                                                                                                                                                                                                                                         |
| <b>BERT-ext + abs + RL + rerank</b>                                                                                                                                                                                                                                                                                                                                                                                                                                                                                                                                                                                                                                                                                                                                                                                                                                                                                                                                                                                                                                                                                                                                                                                                                                                                                                                                                                                                                                                                                                                                                                                                                                                                                                         |
| <p>A noose was found hanging from a tree on campus.<br/> Duke officials have asked anyone with information about the rope noose.<br/> The incident is one of several racist events to affect college students.<br/> Duke University students and faculty members marched Wednesday.</p>                                                                                                                                                                                                                                                                                                                                                                                                                                                                                                                                                                                                                                                                                                                                                                                                                                                                                                                                                                                                                                                                                                                                                                                                                                                                                                                                                                                                                                                     |

Table 8: Example from the CNN/Dail Mail test set showing the generated summary of our best model. The colored sentences in the source document are the corresponding extracted sentences.

|                                                                                                                                                                                                                                                                                                                                                                                                                                                                                                                                                                                                                                                                                                                                                                                                                                                                                                                                                                                                                                                                                                                                                                                                                       |
|-----------------------------------------------------------------------------------------------------------------------------------------------------------------------------------------------------------------------------------------------------------------------------------------------------------------------------------------------------------------------------------------------------------------------------------------------------------------------------------------------------------------------------------------------------------------------------------------------------------------------------------------------------------------------------------------------------------------------------------------------------------------------------------------------------------------------------------------------------------------------------------------------------------------------------------------------------------------------------------------------------------------------------------------------------------------------------------------------------------------------------------------------------------------------------------------------------------------------|
| <b>Source document</b>                                                                                                                                                                                                                                                                                                                                                                                                                                                                                                                                                                                                                                                                                                                                                                                                                                                                                                                                                                                                                                                                                                                                                                                                |
| (CNN) A SkyWest Airlines flight made an emergency landing in Buffalo, New York, on Wednesday after a passenger lost consciousness, officials said. The passenger received medical attention before being released, according to Marissa Snow, spokeswoman for SkyWest. She said the airliner expects to accommodate the 75 passengers on another aircraft to their original destination – Hartford, Connecticut – later Wednesday afternoon. The Federal Aviation Administration initially reported a pressurization problem and said it would investigate. Snow said there was no indication of any pressurization issues, and the FAA later issued a statement that did not reference a pressurization problem. SkyWest also said there was no problem with the plane’s door, which some media initially reported. Flight 5622 was originally scheduled to fly from Chicago to Hartford. The plane descended 28,000 feet in three minutes. “It would feel like a roller coaster – when you’re coming over the top and you’re going down,” CNN aviation analyst Mary Schiavo said, describing how such a descent would feel. “You know that these pilots knew they were in a very grave and very serious situation.” |
| <b>Ground truth summary</b>                                                                                                                                                                                                                                                                                                                                                                                                                                                                                                                                                                                                                                                                                                                                                                                                                                                                                                                                                                                                                                                                                                                                                                                           |
| FAA backtracks on saying crew reported a pressurization problem.<br>One passenger lost consciousness.<br>The plane descended 28,000 feet in three minutes.                                                                                                                                                                                                                                                                                                                                                                                                                                                                                                                                                                                                                                                                                                                                                                                                                                                                                                                                                                                                                                                            |
| <b>BERT-ext + abs + RL + rerank</b>                                                                                                                                                                                                                                                                                                                                                                                                                                                                                                                                                                                                                                                                                                                                                                                                                                                                                                                                                                                                                                                                                                                                                                                   |
| A SkyWest Airlines flight made an emergency landing in New York.<br>FAA initially reported a pressurization problem.<br>The plane descended 28,000 feet in three minutes.<br>The passenger received medical attention before being released.<br>The airliner expects to accommodate 75 passengers on another aircraft.                                                                                                                                                                                                                                                                                                                                                                                                                                                                                                                                                                                                                                                                                                                                                                                                                                                                                                |

Table 9: Example from the CNN/Dail Mail test set showing the generated summary of our best model. The colored sentences in the source document are the corresponding extracted sentences.
